# Supplementary material
Source: Research Square preprint supplement (doi:10.21203/rs.3.rs-9076825/v1)
Supplement: Supplementary file 1 [file 0e887b501f693a5a069cc59e.docx]

| Variables | Total (n = 1968) | No (n = 1368) | Yes (n = 600) |  | *P* |
| --- | --- | --- | --- | --- | --- |
|
| Lung metastases, n(%) |  |  |  |  | 0.847 |
| No | 1895 (96.29) | 1318 (96.35) | 577 (96.17) |  |  |
| Yes | 73 (3.71) | 50 (3.65) | 23 (3.83) |  |  |
| Bone metastases, n(%) |  |  |  |  | 0.069 |
| No | 1921 (97.61) | 1341 (98.03) | 580 (96.67) |  |  |
| Yes | 47 (2.39) | 27 (1.97) | 20 (3.33) |  |  |
| Liver metastases, n(%) |  |  |  |  | 0.209 |
| No | 536 (27.24) | 384 (28.07) | 152 (25.33) |  |  |
| Yes | 1432 (72.76) | 984 (71.93) | 448 (74.67) |  |  |
| Brain metastases, n(%) |  |  |  |  | 0.028 |
| No | 1965 (99.85) | 1368 (100.00) | 597 (99.50) |  |  |
| Yes | 3 (0.15) | 0 (0.00) | 3 (0.50) |  |  |
| DLN metastases, n(%) |  |  |  |  | <.001 |
| No | 1873 (95.17) | 1326 (96.93) | 547 (91.17) |  |  |
| Yes | 95 (4.83) | 42 (3.07) | 53 (8.83) |  |  |
| Widespread metastases, n(%) |  |  |  |  | 0.026 |
| No evidence | 1927 (97.92) | 1333 (97.44) | 594 (99.00) |  |  |
| Yes | 41 (2.08) | 35 (2.56) | 6 (1.00) |  |  |
| Age, n(%) |  |  |  |  | 0.042 |
| ＜60 | 426 (21.65) | 279 (20.39) | 147 (24.50) |  |  |
| ≥60 | 1542 (78.35) | 1089 (79.61) | 453 (75.50) |  |  |
| Sex, n(%) |  |  |  |  | 0.169 |
| Female | 1368 (69.51) | 938 (68.57) | 430 (71.67) |  |  |
| Male | 600 (30.49) | 430 (31.43) | 170 (28.33) |  |  |
| Grade, n(%) |  |  |  |  | <.001 |
| G1-2 | 344 (17.48) | 95 (6.94) | 249 (41.50) |  |  |
| G3-4 | 463 (23.53) | 157 (11.48) | 306 (51.00) |  |  |
| GX | 1161 (58.99) | 1116 (81.58) | 45 (7.50) |  |  |
| T stage, n(%) |  |  |  |  | <.001 |
| T1-2 | 408 (20.73) | 160 (11.70) | 248 (41.33) |  |  |
| T3-4 | 895 (45.48) | 569 (41.59) | 326 (54.33) |  |  |
| TX | 665 (33.79) | 639 (46.71) | 26 (4.33) |  |  |
| N stage, n(%) |  |  |  |  | <.001 |
| N+ | 522 (26.52) | 321 (23.46) | 201 (33.50) |  |  |
| N0 | 834 (42.38) | 541 (39.55) | 293 (48.83) |  |  |
| NX | 612 (31.10) | 506 (36.99) | 106 (17.67) |  |  |
| Radiation recode, n(%) |  |  |  |  | 0.030 |
| None/Unknown | 1837 (93.34) | 1288 (94.15) | 549 (91.50) |  |  |
| Yes | 131 (6.66) | 80 (5.85) | 51 (8.50) |  |  |
| Chemotherapy recode, n(%) |  |  |  |  | 0.245 |
| No/Unknown | 932 (47.36) | 636 (46.49) | 296 (49.33) |  |  |
| Yes | 1036 (52.64) | 732 (53.51) | 304 (50.67) |  |  |
| Postoperative Thery, n(%) |  |  |  |  | 0.004 |
| Cht | 935 (47.51) | 675 (49.34) | 260 (43.33) |  |  |
| Cht+Rad | 101 (5.13) | 57 (4.17) | 44 (7.33) |  |  |
| No CT/Rad | 902 (45.83) | 613 (44.81) | 289 (48.17) |  |  |
| Rad | 30 (1.52) | 23 (1.68) | 7 (1.17) |  |  |
| Tumor Size, n(%) |  |  |  |  | <.001 |
| < 2cm | 131 (6.66) | 51 (3.73) | 80 (13.33) |  |  |
| > 5 cm | 364 (18.50) | 265 (19.37) | 99 (16.50) |  |  |
| 2~5 cm | 425 (21.60) | 214 (15.64) | 211 (35.17) |  |  |
| Unknown | 1048 (53.25) | 838 (61.26) | 210 (35.00) |  |  |
| First malignant primary indicator, n(%) |  |  |  |  | 0.116 |
| No | 269 (13.67) | 198 (14.47) | 71 (11.83) |  |  |
| Yes | 1699 (86.33) | 1170 (85.53) | 529 (88.17) |  |  |
| Race recode, n(%) |  |  |  |  | 0.002 |
| Black | 285 (14.48) | 210 (15.35) | 75 (12.50) |  |  |
| Other (American Indian/AK Native, Asian/Pacific Islander) | 222 (11.28) | 172 (12.57) | 50 (8.33) |  |  |
| Unknown | 6 (0.30) | 6 (0.44) | 0 (0.00) |  |  |
| White | 1455 (73.93) | 980 (71.64) | 475 (79.17) |  |  |
| Marital status, n(%) |  |  |  |  | 0.453 |
| Divorced | 183 (9.30) | 135 (9.87) | 48 (8.00) |  |  |
| Married | 1002 (50.91) | 684 (50.00) | 318 (53.00) |  |  |
| Single | 295 (14.99) | 212 (15.50) | 83 (13.83) |  |  |
| Unknown/other | 107 (5.44) | 77 (5.63) | 30 (5.00) |  |  |
| Widowed | 381 (19.36) | 260 (19.01) | 121 (20.17) |  |  |
| Number of involved sites, n(%) |  |  |  |  | <.001 |
| 1 | 1650 (83.84) | 1103 (80.63) | 547 (91.17) |  |  |
| 2 | 246 (12.50) | 205 (14.99) | 41 (6.83) |  |  |
| 3 | 29 (1.47) | 24 (1.75) | 5 (0.83) |  |  |
| 4 | 2 (0.10) | 1 (0.07) | 1 (0.17) |  |  |
| 5 | 41 (2.08) | 35 (2.56) | 6 (1.00) |  |  |
| Total number, n(%) |  |  |  |  | 0.088 |
| 1 | 1662 (84.45) | 1140 (83.33) | 522 (87.00) |  |  |
| 2 | 254 (12.91) | 190 (13.89) | 64 (10.67) |  |  |
| 3 | 44 (2.24) | 30 (2.19) | 14 (2.33) |  |  |
| 4 | 7 (0.36) | 7 (0.51) | 0 (0.00) |  |  |
| 5 | 1 (0.05) | 1 (0.07) | 0 (0.00) |  |  |
|  | | | | | |
|  | | | | | |
