# Supplementary material
Source: Research Square preprint supplement (doi:10.21203/rs.3.rs-9076825/v1)
Supplement: Supplementary file 2 [file a9b2e2fb0e4d3169ccafbce3.docx]

| Variables |  | univariate analysis | | | |  | multivariate analysis | |
| --- | --- | --- | --- | --- | --- | --- | --- | --- |
|  | *P* | HR (95%CI) |  | *P* | HR (95%CI) | |
| Lung metastases |  |  |  |  |  |  | |
| No |  |  | 1.00 |  |  |  | |
| Yes |  | 0.121 | 0.82 (0.64 ~ 1.05) |  |  |  | |
| Bone metastases |  |  |  |  |  |  | |
| No |  |  | 1.00 |  |  |  | |
| Yes |  | 0.688 | 1.06 (0.78 ~ 1.45) |  |  |  | |
| Liver metastases |  |  |  |  |  |  | |
| No |  |  | 1.00 |  |  |  | |
| Yes |  | 0.526 | 0.97 (0.87 ~ 1.07) |  |  |  | |
| Brain metastases |  |  |  |  |  |  | |
| No |  |  | 1.00 |  |  |  | |
| Yes |  | 0.556 | 1.40 (0.45 ~ 4.36) |  |  |  | |
| DLN metastases |  |  |  |  |  |  | |
| No |  |  | 1.00 |  |  | 1.00 | |
| Yes |  | 0.027 | 0.79 (0.64 ~ 0.97) |  | 0.480 | 0.92 (0.74 ~ 1.15) | |
| Widespread metastases |  |  |  |  |  |  | |
| No evidence |  |  | 1.00 |  |  |  | |
| Yes |  | 0.972 | 1.01 (0.72 ~ 1.41) |  |  |  | |
| Age |  |  |  |  |  |  | |
| ＜60 |  |  | 1.00 |  |  | 1.00 | |
| ≥60 |  | <.001 | 1.27 (1.14 ~ 1.43) |  | 0.080 | 1.11 (0.99 ~ 1.25) | |
| Sex |  |  |  |  |  |  | |
| Female |  |  | 1.00 |  |  |  | |
| Male |  | 0.567 | 0.97 (0.88 ~ 1.07) |  |  |  | |
| Grade |  |  |  |  |  |  | |
| G1-2 |  |  | 1.00 |  |  | 1.00 | |
| G3-4 |  | <.001 | 1.41 (1.21 ~ 1.63) |  | <.001 | 1.41 (1.22 ~ 1.64) | |
| GX |  | <.001 | 1.54 (1.35 ~ 1.75) |  | 0.041 | 1.18 (1.01 ~ 1.38) | |
| T stage |  |  |  |  |  |  | |
| T1-2 |  |  | 1.00 |  |  | 1.00 | |
| T3-4 |  | 0.006 | 1.19 (1.05 ~ 1.35) |  | 0.098 | 1.12 (0.98 ~ 1.28) | |
| TX |  | <.001 | 1.43 (1.25 ~ 1.64) |  | 0.145 | 1.12 (0.96 ~ 1.30) | |
| N stage |  |  |  |  |  |  | |
| N+ |  |  | 1.00 |  |  | 1.00 | |
| N0 |  | 0.004 | 1.18 (1.05 ~ 1.33) |  | 0.234 | 1.08 (0.95 ~ 1.21) | |
| NX |  | <.001 | 1.29 (1.14 ~ 1.46) |  | 0.326 | 1.07 (0.93 ~ 1.23) | |
| PTR |  |  |  |  |  |  | |
| No |  |  | 1.00 |  |  | 1.00 | |
| Yes |  | <.001 | 0.68 (0.61 ~ 0.75) |  | <.001 | 0.69 (0.59 ~ 0.80) | |
| Radiation recode |  |  |  |  |  |  | |
| None/Unknown |  |  | 1.00 |  |  | 1.00 | |
| Yes |  | <.001 | 0.69 (0.57 ~ 0.83) |  | 0.093 | 0.85 (0.70 ~ 1.03) | |
| Chemotherapy recode |  |  |  |  |  |  | |
| No/Unknown |  |  | 1.00 |  |  | 1.00 | |
| Yes |  | <.001 | 0.39 (0.36 ~ 0.43) |  | <.001 | 0.38 (0.35 ~ 0.42) | |
| Tumor Size |  |  |  |  |  |  | |
| < 2cm |  |  | 1.00 |  |  | 1.00 | |
| > 5 cm |  | 0.006 | 1.35 (1.09 ~ 1.68) |  | 0.146 | 1.18 (0.94 ~ 1.47) | |
| 2~5 cm |  | 0.661 | 1.05 (0.85 ~ 1.30) |  | 0.771 | 1.03 (0.83 ~ 1.28) | |
| Unknown |  | <.001 | 1.41 (1.16 ~ 1.72) |  | 0.083 | 1.20 (0.98 ~ 1.47) | |
| Race recode |  |  |  |  |  |  | |
| Black |  |  | 1.00 |  |  | 1.00 | |
| Other (American Indian/AK Native, Asian/Pacific Islander) |  | 0.022 | 0.81 (0.67 ~ 0.97) |  | 0.002 | 0.75 (0.62 ~ 0.90) | |
| Unknown |  | 0.597 | 1.24 (0.55 ~ 2.79) |  | 0.959 | 0.98 (0.43 ~ 2.20) | |
| White |  | 0.050 | 0.88 (0.77 ~ 0.99) |  | 0.003 | 0.82 (0.72 ~ 0.94) | |
| Marital status |  |  |  |  |  |  | |
| Divorced |  |  | 1.00 |  |  |  | |
| Married |  | 0.167 | 0.89 (0.76 ~ 1.05) |  |  |  | |
| Single |  | 0.370 | 1.09 (0.90 ~ 1.33) |  |  |  | |
| Unknown/other |  | 0.456 | 1.10 (0.85 ~ 1.42) |  |  |  | |
| Widowed |  | 0.105 | 1.16 (0.97 ~ 1.40) |  |  |  | |
| Number of involved sites |  |  |  |  |  |  | |
| 1 |  |  | 1.00 |  |  | 1.00 | |
| 2 |  | 0.002 | 1.25 (1.08 ~ 1.43) |  | 0.016 | 1.19 (1.03 ~ 1.37) | |
| 3 |  | 0.151 | 1.32 (0.90 ~ 1.93) |  | 0.607 | 1.11 (0.75 ~ 1.63) | |
| 4 |  | 0.822 | 0.85 (0.21 ~ 3.41) |  | 0.785 | 1.21 (0.30 ~ 4.89) | |
| 5 |  | 0.830 | 1.04 (0.74 ~ 1.45) |  | 0.875 | 1.03 (0.73 ~ 1.44) | |
|  | HR: Hazard Ratio, CI: Confidence Interval | | | | | | | |
|  | word版打开请用微软Office，WPS方法可能导致表格格式混乱，需要手工调整 | | | | | | | |
