# Supplementary material
Source: Research Square preprint supplement (doi:10.21203/rs.3.rs-9076825/v1)
Supplement: Supplementary file 3 [file ae3b1f6ab33de6b2cef6666d.docx]

| Variables |  | 单因素 | | | |  | 多因素 | |
| --- | --- | --- | --- | --- | --- | --- | --- | --- |
|  | *P* | HR (95%CI) |  | *P* | HR (95%CI) | |
| Lung metastases |  |  |  |  |  |  | |
| No |  |  | 1.00 |  |  |  | |
| Yes |  | 0.053 | 0.77 (0.59 ~ 1.00) |  |  |  | |
| Bone metastases |  |  |  |  |  |  | |
| No |  |  | 1.00 |  |  |  | |
| Yes |  | 0.837 | 1.03 (0.75 ~ 1.43) |  |  |  | |
| Liver metastases |  |  |  |  |  |  | |
| No |  |  | 1.00 |  |  |  | |
| Yes |  | 0.972 | 1.00 (0.90 ~ 1.12) |  |  |  | |
| Brain metastases |  |  |  |  |  |  | |
| No |  |  | 1.00 |  |  |  | |
| Yes |  | 0.507 | 0.52 (0.07 ~ 3.66) |  |  |  | |
| DLN metastases |  |  |  |  |  |  | |
| No |  |  | 1.00 |  |  | 1.00 | |
| Yes |  | 0.026 | 0.77 (0.62 ~ 0.97) |  | 0.443 | 0.91 (0.72 ~ 1.15) | |
| Widespread metastases |  |  |  |  |  |  | |
| No evidence |  |  | 1.00 |  |  |  | |
| Yes |  | 0.929 | 0.98 (0.69 ~ 1.40) |  |  |  | |
| Age |  |  |  |  |  |  | |
| ＜60 |  |  | 1.00 |  |  | 1.00 | |
| ≥60 |  | <.001 | 1.26 (1.12 ~ 1.42) |  | 0.134 | 1.10 (0.97 ~ 1.24) | |
| Sex |  |  |  |  |  |  | |
| Female |  |  | 1.00 |  |  |  | |
| Male |  | 0.348 | 0.95 (0.85 ~ 1.06) |  |  |  | |
| Grade |  |  |  |  |  |  | |
| G1-2 |  |  | 1.00 |  |  | 1.00 | |
| G3-4 |  | <.001 | 1.43 (1.23 ~ 1.68) |  | <.001 | 1.43 (1.23 ~ 1.68) | |
| GX |  | <.001 | 1.54 (1.34 ~ 1.76) |  | 0.029 | 1.21 (1.02 ~ 1.43) | |
| T stage |  |  |  |  |  |  | |
| T1-2 |  |  | 1.00 |  |  | 1.00 | |
| T3-4 |  | 0.007 | 1.20 (1.05 ~ 1.37) |  | 0.094 | 1.13 (0.98 ~ 1.29) | |
| TX |  | <.001 | 1.39 (1.21 ~ 1.60) |  | 0.259 | 1.10 (0.93 ~ 1.29) | |
| N stage |  |  |  |  |  |  | |
| N+ |  |  | 1.00 |  |  | 1.00 | |
| N0 |  | 0.022 | 1.15 (1.02 ~ 1.30) |  | 0.348 | 1.06 (0.94 ~ 1.20) | |
| NX |  | <.001 | 1.25 (1.10 ~ 1.42) |  | 0.485 | 1.05 (0.91 ~ 1.21) | |
| PTR |  |  |  |  |  |  | |
| No |  |  | 1.00 |  |  | 1.00 | |
| Yes |  | <.001 | 0.69 (0.62 ~ 0.77) |  | <.001 | 0.70 (0.60 ~ 0.81) | |
| Radiation recode |  |  |  |  |  |  | |
| None/Unknown |  |  | 1.00 |  |  | 1.00 | |
| Yes |  | <.001 | 0.69 (0.57 ~ 0.84) |  | 0.132 | 0.86 (0.70 ~ 1.05) | |
| Chemotherapy recode |  |  |  |  |  |  | |
| No/Unknown |  |  | 1.00 |  |  | 1.00 | |
| Yes |  | <.001 | 0.40 (0.36 ~ 0.44) |  | <.001 | 0.39 (0.35 ~ 0.43) | |
| Tumor Size |  |  |  |  |  |  | |
| < 2cm |  |  | 1.00 |  |  | 1.00 | |
| > 5 cm |  | 0.010 | 1.35 (1.07 ~ 1.69) |  | 0.183 | 1.17 (0.93 ~ 1.48) | |
| 2~5 cm |  | 0.640 | 1.05 (0.84 ~ 1.32) |  | 0.723 | 1.04 (0.83 ~ 1.30) | |
| Unknown |  | 0.002 | 1.38 (1.12 ~ 1.69) |  | 0.136 | 1.18 (0.95 ~ 1.45) | |
| Race recode |  |  |  |  |  |  | |
| Black |  |  | 1.00 |  |  |  | |
| Other (American Indian/AK Native, Asian/Pacific Islander) |  | 0.063 | 0.83 (0.69 ~ 1.01) |  |  |  | |
| Unknown |  | 0.435 | 1.38 (0.61 ~ 3.10) |  |  |  | |
| White |  | 0.068 | 0.88 (0.77 ~ 1.01) |  |  |  | |
| Marital status |  |  |  |  |  |  | |
| Divorced |  |  | 1.00 |  |  |  | |
| Married |  | 0.057 | 0.85 (0.72 ~ 1.00) |  |  |  | |
| Single |  | 0.887 | 1.01 (0.83 ~ 1.24) |  |  |  | |
| Unknown/other |  | 0.750 | 1.04 (0.80 ~ 1.36) |  |  |  | |
| Widowed |  | 0.344 | 1.10 (0.91 ~ 1.33) |  |  |  | |
| Number of involved sites |  |  |  |  |  |  | |
| 1 |  |  | 1.00 |  |  | 1.00 | |
| 2 |  | 0.008 | 1.22 (1.05 ~ 1.42) |  | 0.058 | 1.16 (0.99 ~ 1.34) | |
| 3 |  | 0.140 | 1.35 (0.91 ~ 2.00) |  | 0.482 | 1.16 (0.77 ~ 1.73) | |
| 4 |  | 0.928 | 0.94 (0.23 ~ 3.75) |  | 0.724 | 1.29 (0.32 ~ 5.18) | |
| 5 |  | 0.946 | 1.01 (0.71 ~ 1.45) |  | 0.949 | 0.99 (0.69 ~ 1.42) | |
|  | HR: Hazard Ratio, CI: Confidence Interval | | | | | | | |
|  | word版打开请用微软Office，WPS方法可能导致表格格式混乱，需要手工调整 | | | | | | | |
